# Supplementary material for: Deciphering Role of Wnt Signalling in Cardiac Mesoderm and Cardiomyocyte Differentiation from Human iPSCs: Four-dimensional control of Wnt pathway for hiPSC-CMs differentiation
Source: PubMed Central journal article supplement (PMC6920374; doi:10.1038/s41598-019-55620-x), 2019-12-18
Supplement: 41598_2019_55620_MOESM1_ESM.pdf [file 41598_2019_55620_MOESM1_ESM.pdf]

**Deciphering Role of Wnt Signalling in Cardiac Mesoderm and  
Cardiomyocyte Differentiation from Human iPSCs: Four-dimensional  
control of Wnt pathway for hiPSC-CMs differentiation**

Meng Zhao<sup>1#</sup>, Yawen Tang<sup>1#</sup>, Yang Zhou<sup>1</sup>, Jianyi Zhang<sup>1\*</sup>

<sup>1</sup>Department of Biomedical Engineering, School of Medicine, School of  
Engineering, University of Alabama at Birmingham, Birmingham, AL35233,  
USA.

#These authors contributed equally: Meng Zhao, Yawen Tang.

Correspondence and requests for materials should be addressed to J.Z.  
(email: [jayzhang@uab.edu](mailto:jayzhang@uab.edu))

# Supplemental Figure 1

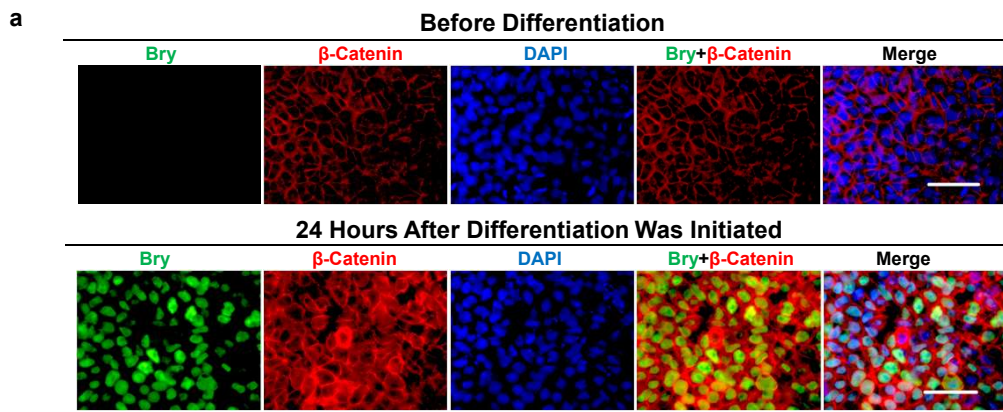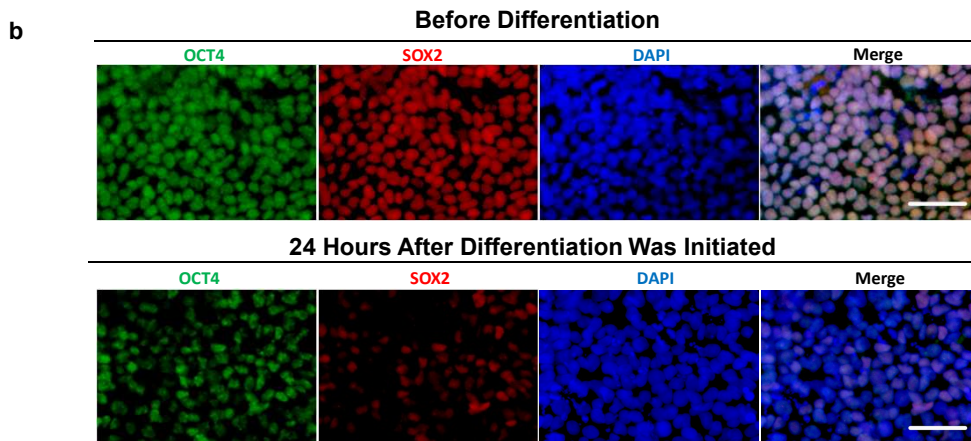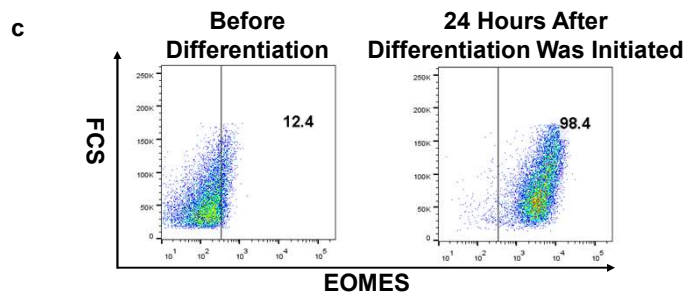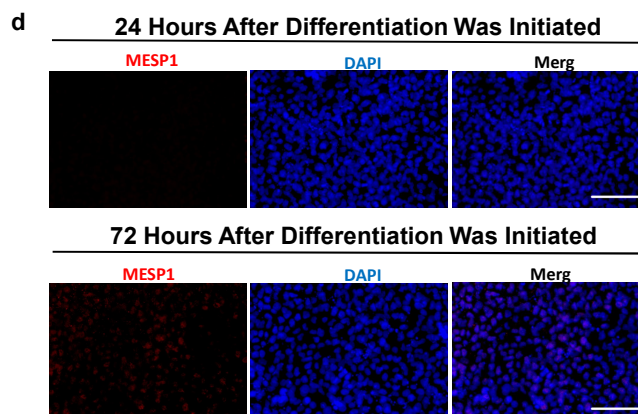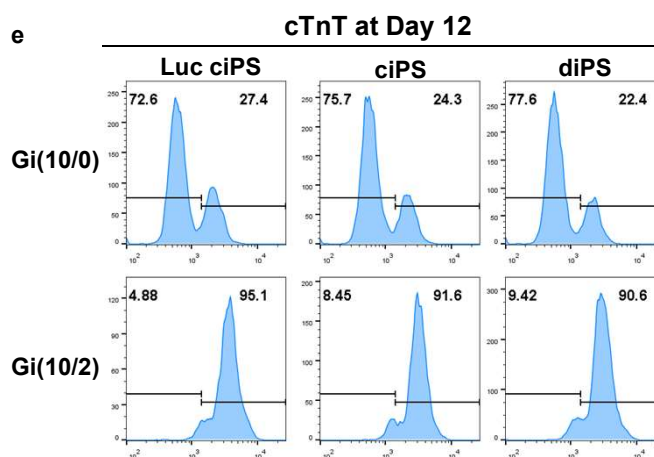

# Supplemental Figure 2

a

FOXA2 at 72 Hours

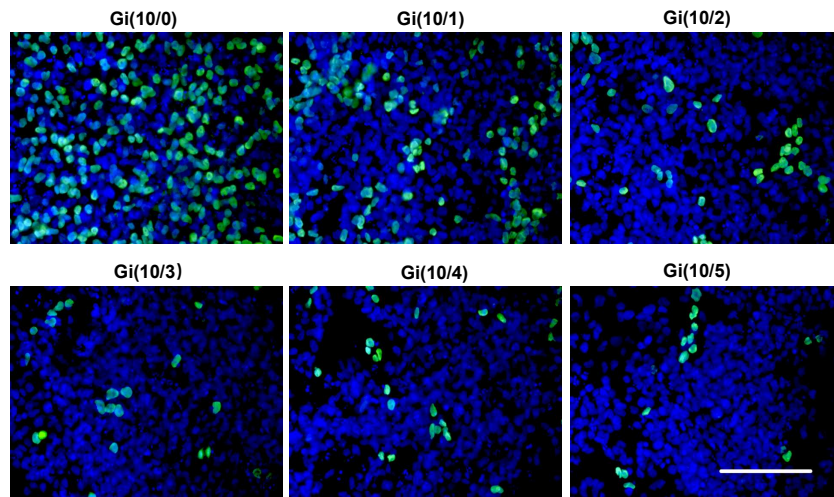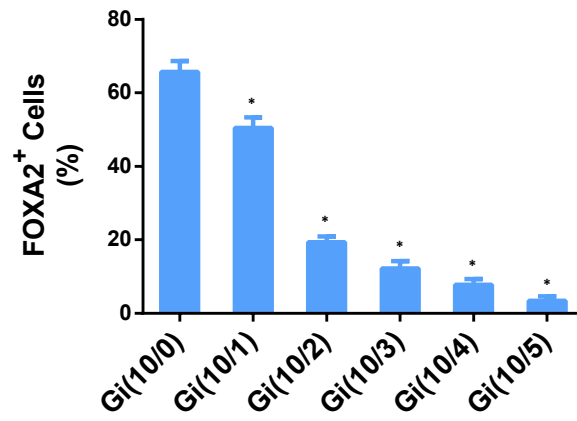

b

CDX2 and EOMES at 72 hours

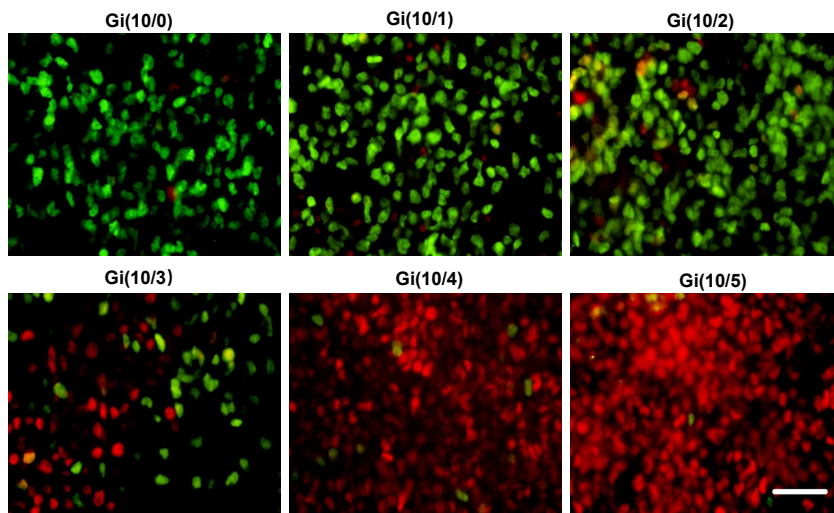

# Supplemental Figure 3

a

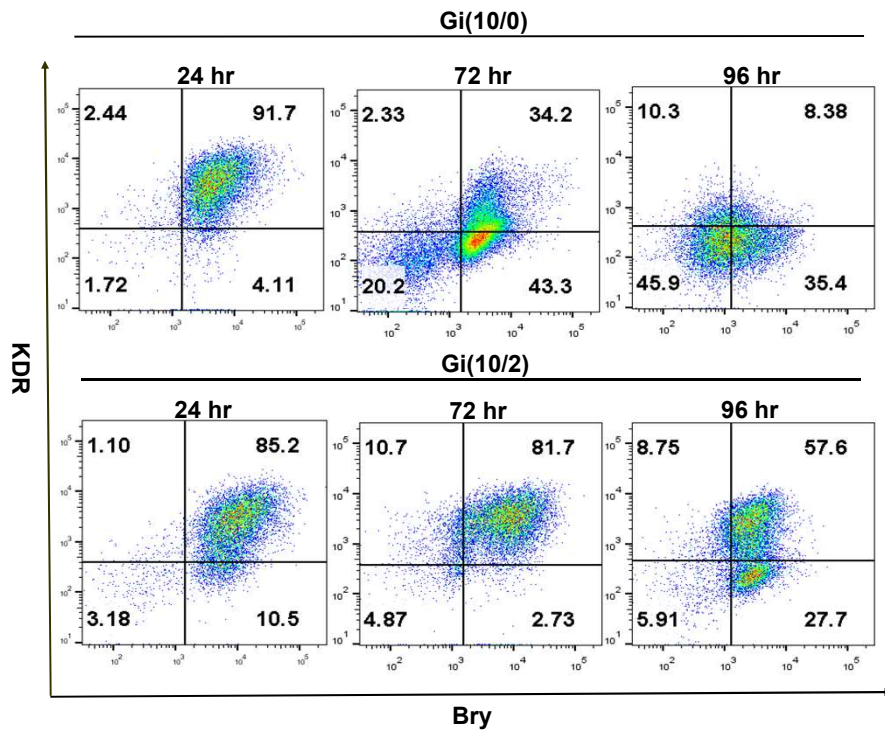

b

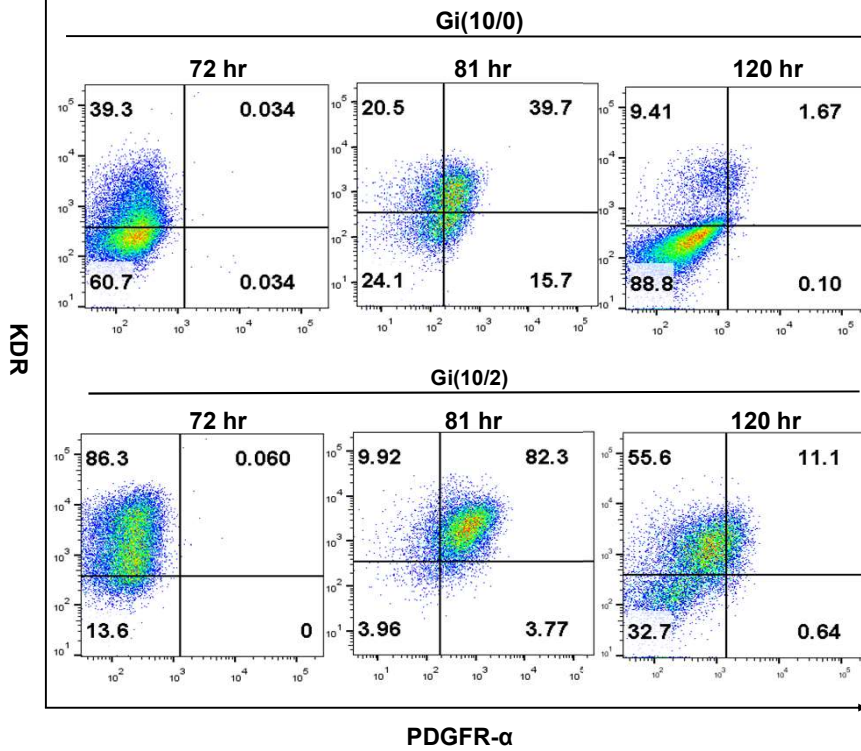

# Supplemental Figure 4

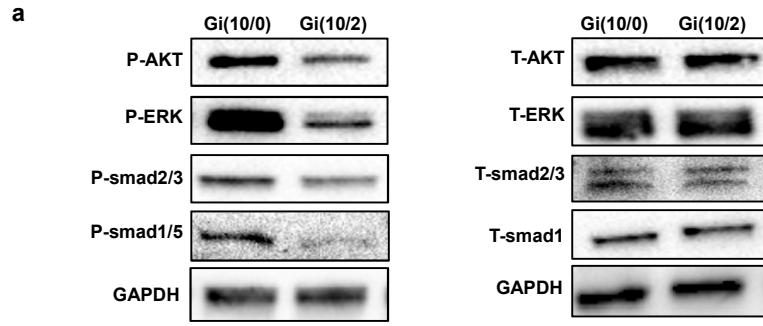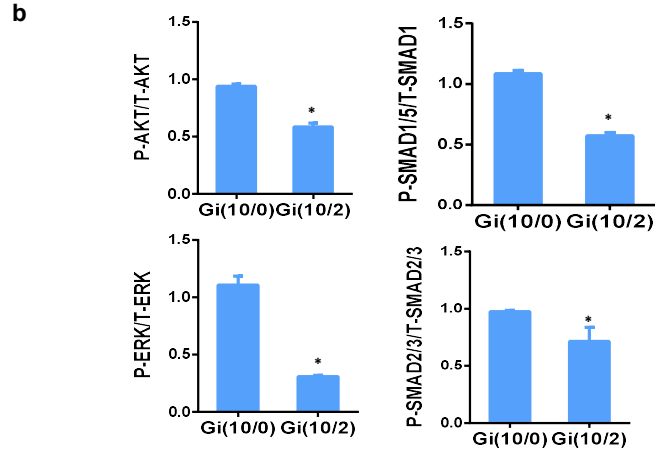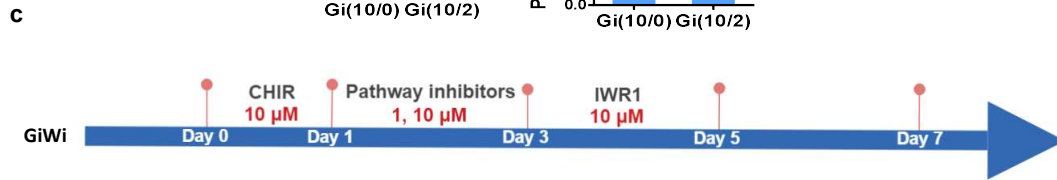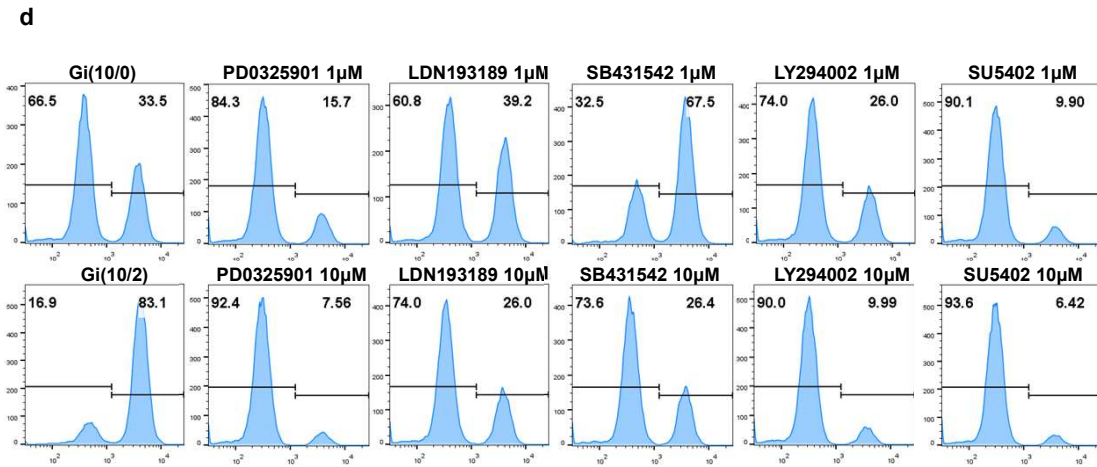



# Supplemental Figure 5

a

Differentiating cells at 72 Hours

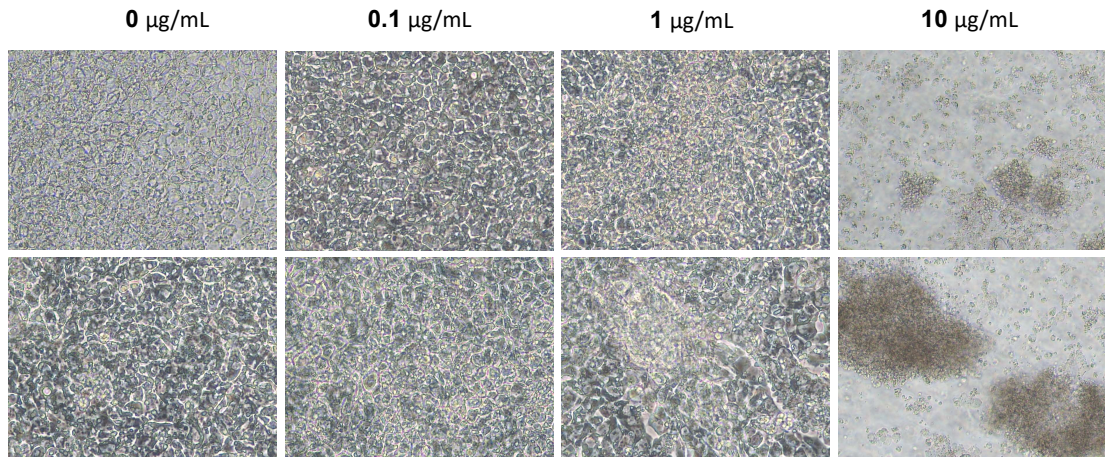

b

TUNEL at 72 Hours

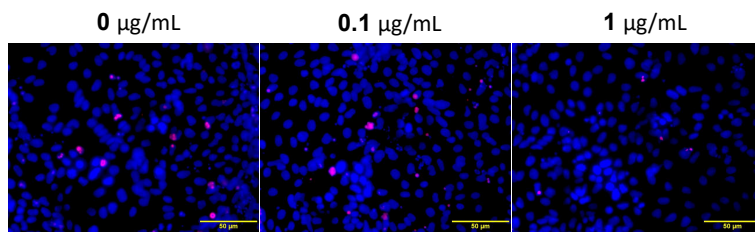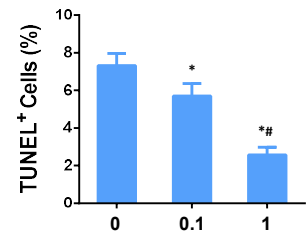

c

cTnT at Day 12

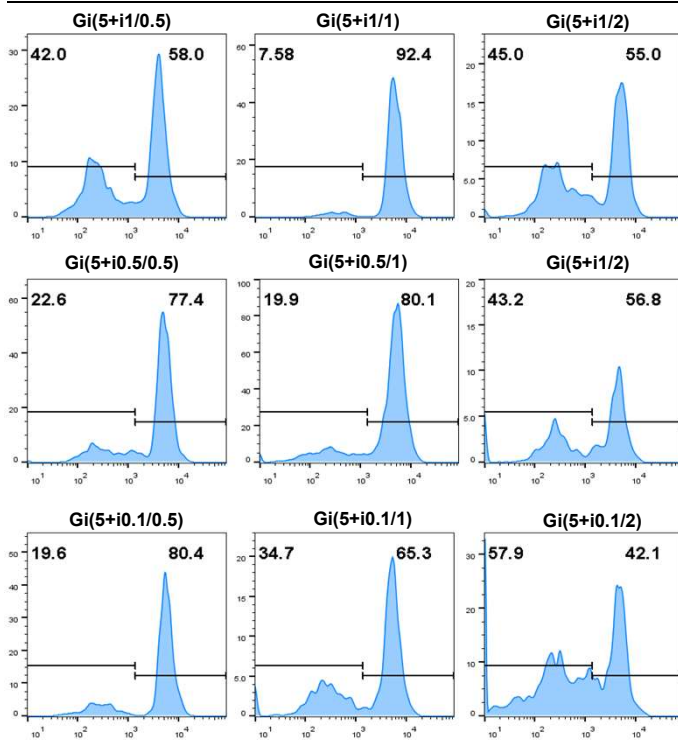

## SUPPLEMENTAL FIGURE LEGENDS

**Supplemental Figure 1. The conventional GiWi protocol fails to sufficiently promote mesendodermal/mesodermal specification in differentiating hiPSCs.** hiPSCs that had been reprogrammed from cardiac fibroblasts (hciPSCs) were differentiated in 10  $\mu$ M CHIR. **(a-b)** The expression of **(a)** the mesendodermal marker Bry and the Wnt-signaling molecule  $\beta$ -catenin and **(b)** the pluripotency genes OCT4 and SOX2 was evaluated via immunofluorescence before differentiation was initiated and 24 hours afterward; nuclei were counter-stained with DAPI (bars=50  $\mu$ m). **(c)** Expression of the mesendodermal marker EOMES was evaluated via flow cytometry before differentiation was initiated and 24 hours afterward. **(d)** Expression of the mesodermal marker MESP1 was evaluated via flow cytometry 24 and 72 hours after differentiation was initiated; nuclei were counter-stained with DAPI (bars=100  $\mu$ m). **(e)** Twelve days after differentiation was initiated, expression of the CM marker cTnT was evaluated in different iPS cell lines, i.e. ciPS, diPS and luc iPS using Gi(10/0) or Gi(10/2) via flow cytometry.

**Supplemental Figure 2. The optimized Gi(I/M)Wi protocol limits endodermal and presomitic/paraxial mesodermal commitment in differentiating hiPSCs.** **(a)** Expression of the definitive endoderm marker FOXA2 was evaluated in cells from the Gi(10/0), Gi(10/1), Gi(10/2), Gi(10/3), Gi(10/4), and Gi(10/5) groups via immunofluorescence at Hour 72 of differentiation (bar=100  $\mu$ m); then, the proportion of cells that expressed FOXA2 was calculated and presented as a percentage of the total number of cells (n=3). \*P<0.05 vs. Gi(10/0). 27 randomly selected fields (3 fields per well) from each group were evaluated. **(b)** Expression of the presomitic mesoderm marker CDX2 and EOMES was evaluated via immunofluorescence in all six treatment groups at Hour 72 of differentiation (bar=50  $\mu$ m).

**Supplemental Figure 3. The optimized Gi(I/M)Wi protocol increases mesendodermal/mesodermal commitment before IWR treatment, and cardiac specification afterward, in differentiating hiPSCs.** The expression of **(a)** the mesodermal marker KDR and Bry and **(b)** KDR and the cardiac mesoderm marker PDGFR $\alpha$  was evaluated via flow cytometry in Gi(10/0) and Gi(10/2) cells at the indicated time points after differentiation was initiated.

**Supplemental Figure 4. Wnt signaling is the predominant regulator of cardiac mesoderm specification in differentiating hiPSCs.** **(a-b)** Protein levels of phosphorylated and total AKT (P-AKT and T-AKT), phosphorylated and total ERK (P-ERK and T-ERK), phosphorylated and total smad2/3 (P-smad2/3 and T-smad2/3), and phosphorylated and total smad1 (P-smad1 and

T-smad1) were **(a)** evaluated via Western blot in Gi(10/0) and Gi(10/2) cells 72 hours after differentiation was initiated and **(b)** presented as the ratio of phosphorylated to total protein (n=3 different batches of differentiated cells). \*P<0.05 vs. Gi(10/0). The blots were collected from different gels without cropping. Different blots were separated by white space. **(c)** hiPSCs were differentiated via the GiWi protocol, and 1 or 10  $\mu$ M concentrations of inhibitors of the PI3K/AKT (LY294002), FGF/ERK (SU5402 and PD0325901), BMP4 (LDN193189), or Smad2/3 (SB431542) pathways were added to the medium from the end of the CHIR treatment phase until the beginning of the IWR1 treatment phase. **(d)** Twelve days after differentiation was initiated, cTnT expression was evaluated via flow cytometry in Gi(10/0) cells and in cells treated with each of the inhibitors. **(e)** Twelve days after differentiation was initiated, expression of the CM marker cTnT was evaluated in luciferase positive cardiac fibroblast derived iPSC clone 1 (luc ciPS), wildtype cardiac fibroblast derived iPSC clone 5 (ciPS), and dermal fibroblast derived iPSC (dips) from Gi(10/0) and Gi(10/2) treatment groups via flow cytometry

**Supplemental Figure 5. The concentration of insulin treatment affects the cell viability during differentiation.** **(a)** Representative bright-field images of differentiating cells with different concentration of insulin treatments 72 hours after differentiation initiation (bar=20  $\mu$ m). **(b)** Cells treated with different insulin concentrations were TUNEL-stained, and nuclei were counter-stained with DAPI (bar=50  $\mu$ m); the number of TUNEL<sup>+</sup> cells were determined and expressed as a percentage of the total number of cells (n=3 different batches of differentiated cells). 27 randomly selected fields (3 fields per well) from each group were evaluated. \*P<0.05 vs 0  $\mu$ g/mL, #P<0.05 vs 0.1  $\mu$ g/mL. **(c)** cTnT expression at day 12 was evaluated in cells from 9 different Gi(I+/M)Wi treatment groups via flow cytometry. Initiation concentration for all groups is 5  $\mu$ M. The insulin treatments are tested at 1  $\mu$ g/mL, 0.5  $\mu$ g/mL and 1  $\mu$ g/mL with maintenance CHIR concentration at 0.5  $\mu$ M, 1  $\mu$ M and 2  $\mu$ M.

**Video S1.** Cardiomyocytes differentiated with either no maintenance CHIR treatment (Gi(10/0)).

**Video S2.** Cardiomyocytes differentiated with low concentration CHIR maintenance (Gi(10/2)).

**Video S3.** Cardiomyocytes differentiated with insulin.

**Video S4.** Cardiomyocytes differentiated without insulin.

**Video S5.** Cardiomyocytes differentiated in suspended culture shot with 10x magnification.

**Video S6.** Cardiomyocytes differentiated in suspended culture shot with 40x magnification.

## SUPPLEMENTAL TABLES



**Supplemental Table 1. Antibodies.**

| <b>Antibody</b>                       | <b>Source</b>          | <b>Identifier</b> |
|---------------------------------------|------------------------|-------------------|
| Mouse Monoclonal $\alpha$ -Actinin    | Sigma                  | A7811             |
| Mouse Monoclonal Human cTnT           | <u>R&amp;D Systems</u> | MAB1874           |
| Mouse Monoclonal Cardiac Troponin T   | Thermo Fisher          | RD2196076         |
| Mouse Monoclonal CDX2                 | Abcam                  | ab86949           |
| Mouse Monoclonal Phospho-Erk1/2       | Cell signaling         | 9106S             |
| Mouse monoclonal Anti-human Nucleolin | Abcam                  | ab198580          |
| Mouse Monoclonal MYH6                 | <u>R&amp;D Systems</u> | MAB8979           |
| Mouse monoclonal EOMES                | <u>R&amp;D Systems</u> | IC6166A           |
| Rabbit Monoclonal Phospho-Smad1/5     | Cell signaling         | 9516S             |
| Rabbit Polyclonal Smad1               | Cell signaling         | 6944T             |
| Rabbit polyclonal N-cadherin          | Abcam                  | ab18203           |
| Rabbit polyclonal Connexin 43         | Abcam                  | ab11370           |
| Rabbit polyclonal SOX2                | Abcam                  | ab97959           |
| Rabbit monoclonal OCT4                | Abcam                  | ab209035          |
| Rabbit monoclonal cyclin D1           | Abcam                  | ab134175          |
| Rabbit polyclonal MYL2                | Proteintech            | 10906-1-AP        |
| Rabbit polyclonal Akt                 | Cell signaling         | 9272S             |
| Rabbit Monoclonal Phospho-Akt         | Cell signaling         | 4060S             |
| Rabbit Monoclonal Erk1/2              | Cell signaling         | 4695S             |

|                                       |                        |             |
|---------------------------------------|------------------------|-------------|
| Rabbit Monoclonal MYH7                | <u>R&amp;D Systems</u> | MAB90961    |
| Rabbit polyclonal CDK4                | Santa Cruz             | sc-260      |
| Rabbit polyclonal Ki67                | EMD Millipore          | Ab9260      |
| Rabbit polyclonal phosphor-Histone H3 | EMD Millipore          | 06-570      |
| Rabbit Monoclonal Phospho-Smad2/3     | <u>R&amp;D Systems</u> | MAB8935     |
| Rabbit polyclonal Eomes               | Abcam                  | ab23345     |
| Rabbit polyclonal $\beta$ -catenin    | Abcam                  | ab6302      |
| Rabbit polyclonal Mesp1               | Abcam                  | ab129387    |
| Goat SOX17 NL637-Conjugated           | <u>R&amp;D Systems</u> | Cat# SC022  |
| Goat polyclonal HAND1                 | <u>R&amp;D Systems</u> | AF3168      |
| Goat polyclonal Brachyury             | <u>R&amp;D Systems</u> | IC2085A     |
| Goat polyclonal Brachyury             | <u>R&amp;D Systems</u> | AF2085      |
| Goat polyclonal Smad2/3               | <u>R&amp;D Systems</u> | AF3797      |
| Rat monoclonal VEGF R2/KDR/Flk-1      | <u>R&amp;D Systems</u> | FAB4432P    |
| Fitc-donkey anti-mouse                | jacksonimmuno          | 715-095-150 |
| Cy3-donkey anti-rabbit                | jacksonimmuno          | 711-165-152 |
| cy5-donkey anti-mouse                 | jacksonimmuno          | 715-175-150 |

**Supplemental Table 2. Reagents, animals and software**

| <b>Name</b>                                          | <b>Source</b>       | <b>Identifier</b> |
|------------------------------------------------------|---------------------|-------------------|
| <b>Chemicals, Peptides, and Recombinant Proteins</b> |                     |                   |
| Fetal bovine serum (FBS)                             | Atlanta Biologicals | S11150            |

|                                    |                   |              |
|------------------------------------|-------------------|--------------|
| Y-27632                            | Stemcell          | 72304        |
| Dnase                              | Fisher scientific | PR-M6101     |
| Donkey Serum                       | Sigma             | D9663        |
| Dimethyl sulfoxide (DMSO)          | Sigma             | D2438        |
| TRIzol reagent                     | Fisher scientific | 15596018     |
| CHIR99021                          | Stemcell          | 72052        |
| IWR1                               | Stemcell          | 72562        |
| Protein Extraction Reagent         | Fisher scientific | PI78501      |
| Protease and Phosphatase Inhibitor | Fisher scientific | PI78442      |
| insulin                            | Sigma             | 91077C       |
| SYBR Green                         | Fisher scientific | 4385617      |
| B27 supplement                     | Fisher scientific | 17-504-044   |
| B27 supplement minus insulin       | Fisher scientific | A1895601     |
| LDN193189                          | Stemcell          | 1435934-00-1 |
| LY294002                           | Millipore         | 154447-36-6  |
| PD0325901                          | Stemcell          | 391210-10-9  |
| SU5402                             | Stemcell          | 215543-92-3  |
| Bovine serum albumin               | Sigma             | A3803        |
| Aceton                             | Fisher scientific | S25904       |
| <b>Critical Commercial Assays</b>  |                   |              |
| Reverse Transcription Kit          | Fisher scientific | 4304134      |
| In Situ Cell death detection Kit   | Sigma             | 12156792910  |

| <b>Experimental Models: Cell Lines</b>        |             |                                                                     |
|-----------------------------------------------|-------------|---------------------------------------------------------------------|
| Human cardiac fibroblast-derived iPS          | This paper  | N/A                                                                 |
| Human dermal fibroblast-derived iPS           | This paper  | N/A                                                                 |
| <b>Experimental Models: Organisms/Strains</b> |             |                                                                     |
| NOD/SCID Mice                                 | Jackson Lab | 001303                                                              |
| <b>Software and Algorithms</b>                |             |                                                                     |
| FlowJo                                        | Flowjo, LLC | N/A                                                                 |
| Graphpad Prism v.6.01                         | Graphpad    | N/A                                                                 |
| Image J                                       | NIH         | <a href="https://imagej.nih.gov/ij/">https://imagej.nih.gov/ij/</a> |

**Supplemental Table 3. Primers**

| <b>Primer</b> | <b>Application</b> | <b>Sequence</b>                       |
|---------------|--------------------|---------------------------------------|
| Bry-FW        | qRT-PCR            | 5'-TGCTTCCCTGAGACCCAGTT-3'            |
| Bry-RV        | qRT-PCR            | 5'-GATCACTTCTTTCTTTGCATCAAG-3'        |
| KDR-FW        | qRT-PCR            | 5'-CCCCAGAAATAAAATGGTATAAAAATG-<br>3' |
| KDR-RV        | qRT-PCR            | 5'-TTTCACTCACTTCCATAATCGTCA-3'        |
| ISL1-FW       | qRT-PCR            | 5'-AGATTATATCAGGTTGTACGGGATCA-3'      |
| ISL1-RV       | qRT-PCR            | 5'-ACACAGCGGAAACACTCGAT-3'            |
| MESP1-FW      | qRT-PCR            | 5'-GAAGTGGTTCCTTGGCAGAC-3'            |
| MESP1-RV      | qRT-PCR            | 5'-TCCTGCTTGCCTCAAAGTGT-3'            |

|           |         |                                |
|-----------|---------|--------------------------------|
| NKX2.5-FW | qRT-PCR | 5'-CAAGTGTGCGTCTGCCTTT-3'      |
| NKX2.5-RV | qRT-PCR | 5'-CAGCTCTTTCTTTTCGGCTCTA-3'   |
| PAX1-FW   | qRT-PCR | 5'-TCGCTATGGAGCAGACGTATG-3'    |
| PAX1-RV   | qRT-PCR | 5'-GCTGCCGACTGATGTCACA-3'      |
| SOX17-FW  | qRT-PCR | 5'-AGATGCTGGGCAAGTCGT-3'       |
| SOX17-RV  | qRT-PCR | 5'-GCTTCAGCCGCTTCACC-3'        |
| SOX2-FW   | qRT-PCR | 5'-TGGACAGTTACGCGCACAT-3'      |
| SOX2-RV   | qRT-PCR | 5'-CGAGTAGGACATGCTGTAGGT-3'    |
| TCF15-FW  | qRT-PCR | 5'-GCACCTTCTGCCTCAGCAACCAGC-3' |
| TCF15-RV  | qRT-PCR | 5'-GGTCCCCCGGTCCCTACACAA-3'    |
| CDX1-FW   | qRT-PCR | 5'-GGTGGCAGCGGTAAGACTC-3'      |
| CDX1-RV   | qRT-PCR | 5'-TGTAACGGCTGTAATGAAACTCC-3'  |
| CDX2-FW   | qRT-PCR | 5'-GGAACCTGTGCGAGTGGAT-3'      |
| CDX2-RV   | qRT-PCR | 5'-TCGATATTTGTCTTTCGTCCTG-3'   |
| EOMES-FW  | qRT-PCR | 5'-CACATTGTAGTGGGCAGTGG-3'     |
| EOMES-RV  | qRT-PCR | 5'-CGCCACCAAAGTGGAGATGAT-3'    |
| FOXA2-FW  | qRT-PCR | 5'-ATTGCTGGTCGTTTGTGTG-3'      |
| FOXA2-RV  | qRT-PCR | 5'-CCTCGGGCTCTGCATAGTAG-3'     |
| HAND1-FW  | qRT-PCR | 5'-GTGAGAGCAAGCGGAAAAG-3'      |
| HAND1-RV  | qRT-PCR | 5'-GTGCGTCCTTTAATCCTCTTC-3'    |
| GATA4-FW  | qRT-PCR | 5'-TGCCGTTTCATCTTGTGGTAG-3'    |
| GATA4-RV  | qRT-PCR | 5'-CCGACACCCCAATCTCG-3'        |



|         |         |                            |
|---------|---------|----------------------------|
| OCT4-FW | qRT-PCR | 5'-CAGTGCCCGAAACCCACAC-3'  |
| OCT4-RV | qRT-PCR | 5'-GGAGACCCAGCAGCCTCAAA-3' |
